# Supplementary material
Source: publisher figshare collection journal article supplement (https://acs.figshare.com/ndownloader/files/5716818)
Supplement: Supplementary file 1 [file 5716818]

# ja0002619.cif
 
data_JA0002619-15-23, DAPS[MnCr(C2O4)3]CH3CN
 
_audit_creation_method            SHELXL 
#_chemical_absolute_configuration  unk???
_chemical_name_systematic 
; 
 ? 
; 
_chemical_name_common             ? 
_chemical_formula_moiety          ? 
_chemical_formula_structural      'C18H23N2[MnCr(C2O4)3]CH3CN' 
_chemical_formula_analytical      ? 
_chemical_formula_sum             'C26 H21 Cr Mn N3 O12' 
_chemical_formula_weight          674.40 
_chemical_melting_point           ? 
_chemical_compound_source         ? 
 
loop_ 
 _atom_type_symbol 
 _atom_type_description 
 _atom_type_scat_dispersion_real 
 _atom_type_scat_dispersion_imag 
 _atom_type_scat_source 
 'C'  'C'   0.0033   0.0016 
 'International Tables Vol C Tables 4.2.6.8 and 6.1.1.4' 
 'N'  'N'   0.0061   0.0033 
 'International Tables Vol C Tables 4.2.6.8 and 6.1.1.4' 
 'O'  'O'   0.0106   0.0060 
 'International Tables Vol C Tables 4.2.6.8 and 6.1.1.4' 
 'H'  'H'   0.0000   0.0000 
 'International Tables Vol C Tables 4.2.6.8 and 6.1.1.4' 
 'Cr'  'Cr'   0.3209   0.6236 
 'International Tables Vol C Tables 4.2.6.8 and 6.1.1.4' 
 'Mn'  'Mn'   0.3368   0.7283 
 'International Tables Vol C Tables 4.2.6.8 and 6.1.1.4' 
 
_symmetry_cell_setting            'monoclinic'                                             
_symmetry_space_group_name_H-M    'P21/c'                                    
 
loop_ 
 _symmetry_equiv_pos_as_xyz 
 'x, y, z' 
 '-x, y+1/2, -z+1/2' 
 '-x, -y, -z' 
 'x, -y-1/2, z-1/2' 
 
_cell_length_a                    9.5274(2) 
_cell_length_b                    15.7802(4) 
_cell_length_c                    20.4054(4) 
_cell_angle_alpha                 90.00 
_cell_angle_beta                  76.510(1) 
_cell_angle_gamma                 90.00 
_cell_volume                      2983.2(1) 
_cell_formula_units_Z             4 
_cell_measurement_temperature     296(2) 
_cell_measurement_reflns_used     ?                                             
_cell_measurement_theta_min       ?                                             
_cell_measurement_theta_max       ?                                             
 
_exptl_crystal_description        'block-shaped'                                             
_exptl_crystal_colour             'dark red'                                             
_exptl_crystal_size_max           0.40                                             
_exptl_crystal_size_mid           0.25                                             
_exptl_crystal_size_min           0.20                                             
_exptl_crystal_density_meas       ? 
_exptl_crystal_density_diffrn     1.502 
_exptl_crystal_density_method     ? 
_exptl_crystal_F_000              1372 
_exptl_absorpt_coefficient_mu     0.853 
_exptl_absorpt_correction_type    none 
_exptl_absorpt_correction_T_min   ? 
_exptl_absorpt_correction_T_max   ? 
 
_exptl_special_details 
; 
 ? 
; 
 
_diffrn_ambient_temperature       296(2) 
_diffrn_radiation_wavelength      0.71073 
_diffrn_radiation_type            MoK\a 
_diffrn_radiation_source          'fine-focus sealed tube' 
_diffrn_radiation_monochromator   graphite 
_diffrn_measurement_device        'ENRAF NONIUS CCD'                                             
_diffrn_measurement_method        ?                                             
_diffrn_standards_number          ?                                             
_diffrn_standards_interval_count  ? 
_diffrn_standards_interval_time   ?                                             
_diffrn_standards_decay_%         ?                                             
_diffrn_reflns_number             10348 
_diffrn_reflns_av_R_equivalents   0.0227 
_diffrn_reflns_av_sigmaI/netI     0.0288 
_diffrn_reflns_limit_h_min        -11 
_diffrn_reflns_limit_h_max        11 
_diffrn_reflns_limit_k_min        -18 
_diffrn_reflns_limit_k_max        18 
_diffrn_reflns_limit_l_min        -24 
_diffrn_reflns_limit_l_max        24 
_diffrn_reflns_theta_min          2.20 
_diffrn_reflns_theta_max          25.08 
_reflns_number_total              5287 
_reflns_number_gt                 4209 
_reflns_threshold_expression      >2sigma(I) 
 
_computing_data_collection        'Kappa CCD ENRAF NONIUS software' 
_computing_cell_refinement        'Kappa CCD ENRAF NONIUS software' 
_computing_data_reduction         'Kappa CCD ENRAF NONIUS software' 
_computing_structure_solution     'SHELXS-86 (Sheldrick, 1990)' 
_computing_structure_refinement   'SHELXL-93 (Sheldrick, 1993)' 
_computing_molecular_graphics     'ORTEPII, Johnson' 
_computing_publication_material   'ACTA' 
 
_refine_special_details 
; 
 Refinement on F^2^ for ALL reflections except for 7 with very negative F^2^ 
 or flagged by the user for potential systematic errors.  Weighted R-factors 
 wR and all goodnesses of fit S are based on F^2^, conventional R-factors R 
 are based on F, with F set to zero for negative F^2^. The observed criterion 
 of F^2^ > 2sigma(F^2^) is used only for calculating _R_factor_obs etc. and is 
 not relevant to the choice of reflections for refinement.  R-factors based 
 on F^2^ are statistically about twice as large as those based on F, and R- 
 factors based on ALL data will be even larger. 
; 
 
_refine_ls_structure_factor_coef  Fsqd  
_refine_ls_matrix_type            full 
_refine_ls_weighting_scheme 
 'calc w=1/[\s^2^(Fo^2^)+(0.0369P)^2^+3.4051P] where P=(Fo^2^+2Fc^2^)/3' 
_atom_sites_solution_primary      direct 
_atom_sites_solution_secondary    difmap 
_atom_sites_solution_hydrogens    geom 
_refine_ls_hydrogen_treatment     constr 
_refine_ls_extinction_method      none 
_refine_ls_extinction_coef        ? 
_refine_ls_number_reflns          5280 
_refine_ls_number_parameters      473 
_refine_ls_number_restraints      49 
_refine_ls_R_factor_all           0.0673 
_refine_ls_R_factor_gt            0.0498 
_refine_ls_wR_factor_all          0.1243 
_refine_ls_wR_factor_ref          0.1108 
_refine_ls_goodness_of_fit_all    1.122 
_refine_ls_goodness_of_fit_ref    1.169 
_refine_ls_restrained_S_all       1.155 
_refine_ls_restrained_S_obs       1.166 
_refine_ls_shift/su_max           0.361 
_refine_ls_shift/esd_mean         0.018 
 
loop_ 
 _atom_site_label 
 _atom_site_type_symbol 
 _atom_site_fract_x 
 _atom_site_fract_y 
 _atom_site_fract_z 
 _atom_site_U_iso_or_equiv 
 _atom_site_thermal_displace_type 
 _atom_site_occupancy 
 _atom_site_calc_flag 
 _atom_site_refinement_flags 
 _atom_site_disorder_group 
Mn Mn 0.23032(5) 0.12955(3) 0.23349(3) 0.0497(2) Uani 1 d . . 
Cr Cr 0.27369(6) 0.46858(3) 0.26239(3) 0.0430(2) Uani 1 d . . 
O11 O 0.2048(2) 0.56488(15) 0.21595(11) 0.0490(6) Uani 1 d . . 
O12 O 0.0743(2) 0.47094(15) 0.31841(11) 0.0499(6) Uani 1 d . . 
C1 C 0.0712(3) 0.5791(2) 0.2375(2) 0.0433(7) Uani 1 d . . 
C2 C -0.0048(4) 0.5252(2) 0.2987(2) 0.0447(8) Uani 1 d . . 
O21 O -0.0020(3) 0.6305(2) 0.21467(12) 0.0568(6) Uani 1 d . . 
O22 O -0.1340(2) 0.5377(2) 0.32307(12) 0.0567(6) Uani 1 d . . 
O13 O 0.3503(2) 0.54247(15) 0.32369(11) 0.0473(5) Uani 1 d . . 
O14 O 0.4714(2) 0.47747(15) 0.20615(11) 0.0491(6) Uani 1 d . . 
C3 C 0.4822(3) 0.5609(2) 0.3020(2) 0.0416(7) Uani 1 d . . 
C4 C 0.5533(3) 0.5221(2) 0.2325(2) 0.0421(7) Uani 1 d . . 
O23 O 0.5559(2) 0.6048(2) 0.33078(11) 0.0514(6) Uani 1 d . . 
O24 O 0.6830(2) 0.5356(2) 0.20884(12) 0.0542(6) Uani 1 d . . 
O15 O 0.3163(2) 0.36442(14) 0.30776(11) 0.0485(6) Uani 1 d . . 
O16 O 0.2192(3) 0.38710(15) 0.19927(11) 0.0517(6) Uani 1 d . . 
C5 C 0.2871(3) 0.2977(2) 0.2798(2) 0.0441(8) Uani 1 d . . 
C6 C 0.2333(3) 0.3113(2) 0.2147(2) 0.0442(8) Uani 1 d . . 
O25 O 0.2934(3) 0.22437(15) 0.30027(12) 0.0521(6) Uani 1 d . . 
O26 O 0.2075(3) 0.2481(2) 0.18359(12) 0.0556(6) Uani 1 d . . 
C21 C 0.0410(10) 0.7806(7) 0.4981(5) 0.082(3) Uani 0.80 d PD 1 
C26 C -0.0347(22) 0.8271(10) 0.5546(4) 0.072(5) Uani 0.80 d PD 1 
H26 H -0.0243(22) 0.8122(10) 0.5973(4) 0.087 Uiso 0.80 calc PR 1 
C25 C -0.1230(17) 0.8936(8) 0.5480(6) 0.081(3) Uani 0.80 d PD 1 
H25 H -0.1752(17) 0.9206(8) 0.5865(6) 0.098 Uiso 0.80 calc PR 1 
C24 C -0.1368(10) 0.9218(5) 0.4849(5) 0.073(2) Uani 0.80 d PD 1 
C23 C -0.0561(9) 0.8788(5) 0.4293(3) 0.091(2) Uani 0.80 d PD 1 
H23 H -0.0584(9) 0.8976(5) 0.3864(3) 0.109 Uiso 0.80 calc PR 1 
C22 C 0.0250(10) 0.8110(5) 0.4354(3) 0.090(2) Uani 0.80 d PD 1 
H22 H 0.0727(10) 0.7829(5) 0.3965(3) 0.107 Uiso 0.80 calc PR 1 
C31 C -0.2258(7) 0.9918(4) 0.4720(3) 0.090(2) Uani 0.80 d PD 1 
H31 H -0.2268(7) 1.0021(4) 0.4272(3) 0.108 Uiso 0.80 calc PR 1 
C30 C -0.3034(7) 1.0408(4) 0.5165(3) 0.082(2) Uani 0.80 d PD 1 
H30 H -0.3028(7) 1.0315(4) 0.5614(3) 0.099 Uiso 0.80 calc PR 1 
N11 N -0.5516(10) 1.2529(5) 0.4789(4) 0.066(3) Uani 0.80 d PD 1 
C12 C -0.5082(15) 1.1966(8) 0.4301(4) 0.085(3) Uani 0.80 d PD 1 
H12 H -0.5338(15) 1.2037(8) 0.3891(4) 0.102 Uiso 0.80 calc PR 1 
C13 C -0.4265(10) 1.1286(5) 0.4392(4) 0.084(2) Uani 0.80 d PD 1 
H13 H -0.3912(10) 1.0926(5) 0.4031(4) 0.101 Uiso 0.80 calc PR 1 
C14 C -0.3945(7) 1.1117(4) 0.5008(4) 0.074(2) Uani 0.80 d PD 1 
C15 C -0.4525(8) 1.1678(5) 0.5519(3) 0.082(2) Uani 0.80 d PD 1 
H15 H -0.4405(8) 1.1581(5) 0.5953(3) 0.098 Uiso 0.80 calc PR 1 
C16 C -0.5270(19) 1.2370(8) 0.5394(5) 0.081(4) Uani 0.80 d PD 1 
H16 H -0.5622(19) 1.2748(8) 0.5744(5) 0.097 Uiso 0.80 calc PR 1 
C9 C -0.6309(7) 1.3315(5) 0.4645(3) 0.077(2) Uani 0.80 d PD 1 
H9 H -0.6837(7) 1.3189(5) 0.4298(3) 0.092 Uiso 0.80 calc PR 1 
C7 C -0.7351(9) 1.3648(6) 0.5273(4) 0.106(3) Uani 0.80 d PD 1 
H7A H -0.7926(36) 1.4094(20) 0.5150(5) 0.127 Uiso 0.80 calc PR 1 
H7B H -0.6817(9) 1.3864(26) 0.5581(11) 0.127 Uiso 0.80 calc PR 1 
H7C H -0.7969(32) 1.3196(9) 0.5484(12) 0.127 Uiso 0.80 calc PR 1 
C8 C -0.5142(18) 1.4007(9) 0.4380(8) 0.128(7) Uani 0.80 d PD 1 
H8A H -0.5606(17) 1.4519(13) 0.4288(27) 0.153 Uiso 0.80 calc PR 1 
H8B H -0.4499(35) 1.3810(16) 0.3974(15) 0.153 Uiso 0.80 calc PR 1 
H8C H -0.4605(43) 1.4116(26) 0.4715(12) 0.153 Uiso 0.80 calc PR 1 
C28 C 0.1731(16) 0.6566(6) 0.4463(5) 0.111(4) Uani 0.80 d PD 1 
H28A H 0.0996(15) 0.6345(25) 0.4259(15) 0.133 Uiso 0.80 calc PR 1 
H28B H 0.2261(50) 0.6105(20) 0.4597(6) 0.133 Uiso 0.80 calc PR 1 
H28C H 0.2377(37) 0.6917(11) 0.4144(11) 0.133 Uiso 0.80 calc PR 1 
C29 C 0.1178(9) 0.6781(6) 0.5695(4) 0.110(3) Uani 0.80 d PD 1 
H29A H 0.1742(45) 0.6271(18) 0.5651(4) 0.132 Uiso 0.80 calc PR 1 
H29B H 0.0229(10) 0.6671(30) 0.5967(9) 0.132 Uiso 0.80 calc PR 1 
H29C H 0.1635(50) 0.7212(14) 0.5904(11) 0.132 Uiso 0.80 calc PR 1 
N27 N 0.1072(12) 0.7060(6) 0.5045(5) 0.092(5) Uani 0.80 d PD 1 
N11' C -0.5678(50) 1.2636(22) 0.4877(19) 0.072(18) Uiso 0.20 d PD 2 
C12' C -0.5216(70) 1.2210(25) 0.4254(19) 0.086(15) Uiso 0.20 d PD 2 
C13' C -0.4556(40) 1.1436(19) 0.4203(14) 0.069(10) Uiso 0.20 d PD 2 
C14' C -0.3926(33) 1.1134(15) 0.4717(14) 0.053(8) Uiso 0.20 d PD 2 
C15' C -0.4111(27) 1.1658(15) 0.5285(11) 0.055(7) Uiso 0.20 d PD 2 
C16' C -0.4941(72) 1.2367(30) 0.5371(21) 0.080(19) Uiso 0.20 d PD 2 
C30' C -0.3091(15) 1.0375(8) 0.4674(7) 0.030(3) Uiso 0.20 d PD 2 
C31' C -0.2490(17) 1.0025(9) 0.5152(8) 0.031(4) Uiso 0.20 d PD 2 
C21' N 0.0025(24) 0.7775(14) 0.5010(12) 0.039(6) Uiso 0.20 d PD 2 
C22' C -0.0434(26) 0.8037(16) 0.4467(12) 0.068(9) Uiso 0.20 d PD 2 
C23' C -0.1266(24) 0.8759(14) 0.4495(11) 0.058(7) Uiso 0.20 d PD 2 
C24' C -0.1633(43) 0.9249(20) 0.5074(14) 0.066(12) Uiso 0.20 d PD 2 
C25' C -0.1112(72) 0.8967(29) 0.5616(18) 0.066(12) Uiso 0.20 d PD 2 
C26' C -0.0498(95) 0.8184(39) 0.5593(16) 0.072(19) Uiso 0.20 d PD 2 
N27' C 0.1171(47) 0.7103(27) 0.4963(20) 0.105(28) Uiso 0.20 d PD 2 
C28' C 0.1417(96) 0.6617(40) 0.4304(19) 0.177(36) Uiso 0.20 d PD 2 
C29' C 0.0691(34) 0.6478(17) 0.5574(15) 0.077(9) Uiso 0.20 d PD 2 
C7' C -0.7700(34) 1.3602(30) 0.4995(24) 0.153(22) Uiso 0.20 d PD 2 
C8' C -0.5307(50) 1.3980(24) 0.4332(19) 0.061(10) Uiso 0.20 d PD 2 
C9' N -0.6145(33) 1.3485(16) 0.4890(15) 0.129(14) Uiso 0.20 d PD 2 
N1S N 0.3847(7) 0.7715(5) 0.2835(5) 0.203(4) Uani 1 d . . 
C1S C 0.2918(7) 0.7950(4) 0.2637(3) 0.108(2) Uani 1 d . . 
C2S C 0.1771(8) 0.8292(5) 0.2432(4) 0.143(3) Uani 1 d . . 
H2S1 H 0.1162(29) 0.7845(5) 0.2339(24) 0.185 Uiso 1 calc R . 
H2S2 H 0.2118(8) 0.8622(26) 0.2032(15) 0.185 Uiso 1 calc R . 
H2S3 H 0.1229(31) 0.8649(24) 0.2782(11) 0.185 Uiso 1 calc R . 
 
loop_ 
 _atom_site_aniso_label 
 _atom_site_aniso_U_11 
 _atom_site_aniso_U_22 
 _atom_site_aniso_U_33 
 _atom_site_aniso_U_23 
 _atom_site_aniso_U_13 
 _atom_site_aniso_U_12 
Mn 0.0403(3) 0.0456(3) 0.0650(4) -0.0040(2) -0.0159(2) 0.0000(2) 
Cr 0.0390(3) 0.0435(3) 0.0477(3) 0.0018(2) -0.0126(2) -0.0003(2) 
O11 0.0392(13) 0.0512(14) 0.0542(13) 0.0113(11) -0.0061(10) -0.0009(11) 
O12 0.0402(12) 0.0524(14) 0.0568(14) 0.0175(11) -0.0106(11) -0.0013(11) 
C1 0.043(2) 0.040(2) 0.048(2) 0.0060(15) -0.0138(15) -0.0028(15) 
C2 0.044(2) 0.043(2) 0.048(2) 0.0040(15) -0.012(2) -0.004(2) 
O21 0.0477(14) 0.058(2) 0.0634(15) 0.0205(12) -0.0114(12) 0.0023(12) 
O22 0.0387(13) 0.062(2) 0.0650(15) 0.0173(12) -0.0033(11) 0.0033(11) 
O13 0.0392(12) 0.0526(14) 0.0472(12) -0.0069(10) -0.0042(10) -0.0014(10) 
O14 0.0430(12) 0.0551(15) 0.0479(13) -0.0089(11) -0.0078(10) -0.0015(11) 
C3 0.041(2) 0.038(2) 0.047(2) 0.0029(14) -0.0106(15) 0.0047(14) 
C4 0.041(2) 0.037(2) 0.048(2) 0.0004(14) -0.0098(15) 0.0043(14) 
O23 0.0441(13) 0.0566(15) 0.0545(14) -0.0105(11) -0.0134(11) -0.0029(11) 
O24 0.0413(13) 0.0564(15) 0.0592(14) -0.0094(12) -0.0001(11) -0.0009(11) 
O15 0.0540(14) 0.0469(13) 0.0508(13) 0.0000(11) -0.0249(11) 0.0016(11) 
O16 0.0603(15) 0.0492(15) 0.0532(14) 0.0015(11) -0.0289(12) -0.0004(11) 
C5 0.036(2) 0.047(2) 0.052(2) -0.001(2) -0.0156(15) -0.0034(14) 
C6 0.036(2) 0.047(2) 0.051(2) 0.001(2) -0.0142(15) -0.0003(15) 
O25 0.0581(15) 0.0434(14) 0.0619(14) 0.0056(11) -0.0282(12) -0.0012(11) 
O26 0.062(2) 0.0523(15) 0.0605(15) -0.0041(12) -0.0303(12) 0.0006(12) 
C21 0.062(5) 0.121(7) 0.059(4) -0.002(3) -0.006(4) -0.003(5) 
C26 0.073(7) 0.097(8) 0.043(4) 0.001(3) -0.006(3) 0.005(6) 
C25 0.079(6) 0.091(6) 0.063(5) -0.008(4) 0.005(5) 0.006(4) 
C24 0.062(5) 0.069(5) 0.092(6) 0.015(5) -0.026(5) -0.006(3) 
C23 0.112(6) 0.109(6) 0.055(4) -0.001(4) -0.027(4) 0.008(5) 
C22 0.123(7) 0.100(6) 0.044(3) -0.003(3) -0.016(4) 0.013(5) 
C31 0.090(5) 0.106(5) 0.067(4) -0.004(4) -0.007(3) -0.016(4) 
C30 0.089(5) 0.085(5) 0.068(4) 0.000(3) -0.009(3) -0.006(4) 
N11 0.064(4) 0.079(5) 0.049(3) 0.002(3) -0.004(3) 0.011(3) 
C12 0.105(7) 0.095(8) 0.056(4) -0.008(4) -0.018(3) -0.003(6) 
C13 0.101(6) 0.082(5) 0.066(5) -0.016(4) -0.009(5) 0.007(4) 
C14 0.067(4) 0.080(5) 0.071(5) 0.003(4) -0.011(4) -0.008(3) 
C15 0.086(5) 0.104(6) 0.051(4) 0.001(3) -0.007(4) 0.010(4) 
C16 0.086(9) 0.091(7) 0.063(5) -0.012(3) -0.014(4) 0.023(5) 
C9 0.085(4) 0.094(5) 0.060(3) -0.001(3) -0.033(3) 0.009(3) 
C7 0.093(5) 0.125(7) 0.091(5) 0.014(5) -0.006(4) 0.044(5) 
C8 0.115(10) 0.116(8) 0.150(10) 0.055(7) -0.029(6) 0.001(6) 
C28 0.133(8) 0.090(6) 0.094(5) -0.012(4) 0.005(6) 0.035(5) 
C29 0.101(6) 0.118(7) 0.110(6) 0.033(5) -0.023(5) 0.018(5) 
N27 0.106(7) 0.094(6) 0.063(4) 0.008(3) 0.007(3) 0.036(4) 
N1S 0.100(5) 0.214(8) 0.273(9) 0.121(7) 0.000(5) 0.026(5) 
C1S 0.082(4) 0.091(4) 0.138(5) 0.035(4) 0.000(4) 0.000(3) 
C2S 0.125(6) 0.160(7) 0.153(6) 0.051(5) -0.052(5) -0.031(5) 
 
_geom_special_details 
; 
 All esds (except the esd in the dihedral angle between two l.s. planes) 
 are estimated using the full covariance matrix.  The cell esds are taken 
 into account individually in the estimation of esds in distances, angles 
 and torsion angles; correlations between esds in cell parameters are only 
 used when they are defined by crystal symmetry.  An approximate (isotropic) 
 treatment of cell esds is used for estimating esds involving l.s. planes. 
; 
 
loop_ 
 _geom_bond_atom_site_label_1 
 _geom_bond_atom_site_label_2 
 _geom_bond_distance 
 _geom_bond_site_symmetry_2 
 _geom_bond_publ_flag 
Mn O26 2.165(2) . ? 
Mn O24 2.173(2) 2_645 ? 
Mn O22 2.183(2) 2_545 ? 
Mn O23 2.185(2) 2_645 ? 
Mn O21 2.186(2) 2_545 ? 
Mn O25 2.200(2) . ? 
Cr O14 1.969(2) . ? 
Cr O13 1.970(2) . ? 
Cr O16 1.973(2) . ? 
Cr O15 1.974(2) . ? 
Cr O12 1.975(2) . ? 
Cr O11 1.982(2) . ? 
O11 C1 1.267(4) . ? 
O12 C2 1.266(4) . ? 
C1 O21 1.230(4) . ? 
C1 C2 1.545(4) . ? 
C2 O22 1.231(4) . ? 
O21 Mn 2.186(2) 2 ? 
O22 Mn 2.183(2) 2 ? 
O13 C3 1.266(4) . ? 
O14 C4 1.260(4) . ? 
C3 O23 1.229(4) . ? 
C3 C4 1.548(4) . ? 
C4 O24 1.235(4) . ? 
O23 Mn 2.185(2) 2_655 ? 
O24 Mn 2.173(2) 2_655 ? 
O15 C5 1.259(4) . ? 
O16 C6 1.252(4) . ? 
C5 O25 1.237(4) . ? 
C5 C6 1.546(4) . ? 
C6 O26 1.237(4) . ? 
C21 N27 1.356(11) . ? 
C21 C22 1.408(10) . ? 
C21 C26 1.414(10) . ? 
C26 C25 1.371(11) . ? 
C25 C24 1.396(12) . ? 
C24 C23 1.391(12) . ? 
C24 C31 1.454(9) . ? 
C23 C22 1.341(10) . ? 
C31 C30 1.287(8) . ? 
C30 C14 1.496(9) . ? 
N11 C12 1.327(11) . ? 
N11 C16 1.332(9) . ? 
N11 C9 1.518(9) . ? 
C12 C13 1.364(13) . ? 
C13 C14 1.386(11) . ? 
C14 C15 1.382(10) . ? 
C15 C16 1.359(10) . ? 
C9 C7 1.519(9) . ? 
C9 C8 1.562(13) . ? 
C28 N27 1.437(9) . ? 
C29 N27 1.424(10) . ? 
N11' C9' 1.41(3) . ? 
N11' C12' 1.41(3) . ? 
N11' C16' 1.42(3) . ? 
C12' C13' 1.37(3) . ? 
C13' C14' 1.41(2) . ? 
C14' C15' 1.40(2) . ? 
C14' C30' 1.43(2) . ? 
C15' C16' 1.36(2) . ? 
C30' C31' 1.36(2) . ? 
C31' C24' 1.46(2) . ? 
C21' C26' 1.34(2) . ? 
C21' C22' 1.35(2) . ? 
C21' N27' 1.51(2) . ? 
C22' C23' 1.38(2) . ? 
C23' C24' 1.39(2) . ? 
C24' C25' 1.39(3) . ? 
C25' C26' 1.36(3) . ? 
N27' C28' 1.52(3) . ? 
N27' C29' 1.57(3) . ? 
C7' C9' 1.46(3) . ? 
C8' C9' 1.45(3) . ? 
N1S C1S 1.117(8) . ? 
C1S C2S 1.369(9) . ? 
 
loop_ 
 _geom_angle_atom_site_label_1 
 _geom_angle_atom_site_label_2 
 _geom_angle_atom_site_label_3 
 _geom_angle 
 _geom_angle_site_symmetry_1 
 _geom_angle_site_symmetry_3 
 _geom_angle_publ_flag 
O26 Mn O24 159.59(9) . 2_645 ? 
O26 Mn O22 102.95(10) . 2_545 ? 
O24 Mn O22 95.34(10) 2_645 2_545 ? 
O26 Mn O23 93.11(9) . 2_645 ? 
O24 Mn O23 77.53(8) 2_645 2_645 ? 
O22 Mn O23 90.68(9) 2_545 2_645 ? 
O26 Mn O21 91.36(10) . 2_545 ? 
O24 Mn O21 101.76(9) 2_645 2_545 ? 
O22 Mn O21 76.53(8) 2_545 2_545 ? 
O23 Mn O21 167.10(9) 2_645 2_545 ? 
O26 Mn O25 77.03(9) . . ? 
O24 Mn O25 86.29(9) 2_645 . ? 
O22 Mn O25 171.14(9) 2_545 . ? 
O23 Mn O25 98.18(9) 2_645 . ? 
O21 Mn O25 94.61(9) 2_545 . ? 
O14 Cr O13 83.24(9) . . ? 
O14 Cr O16 91.57(10) . . ? 
O13 Cr O16 173.10(10) . . ? 
O14 Cr O15 93.40(10) . . ? 
O13 Cr O15 92.76(9) . . ? 
O16 Cr O15 82.97(9) . . ? 
O14 Cr O12 174.82(10) . . ? 
O13 Cr O12 94.01(9) . . ? 
O16 Cr O12 91.51(10) . . ? 
O15 Cr O12 91.11(9) . . ? 
O14 Cr O11 92.59(9) . . ? 
O13 Cr O11 93.60(10) . . ? 
O16 Cr O11 91.18(10) . . ? 
O15 Cr O11 171.74(10) . . ? 
O12 Cr O11 83.18(9) . . ? 
C1 O11 Cr 112.8(2) . . ? 
C2 O12 Cr 113.1(2) . . ? 
O21 C1 O11 126.7(3) . . ? 
O21 C1 C2 118.0(3) . . ? 
O11 C1 C2 115.3(3) . . ? 
O22 C2 O12 126.5(3) . . ? 
O22 C2 C1 118.2(3) . . ? 
O12 C2 C1 115.3(3) . . ? 
C1 O21 Mn 113.6(2) . 2 ? 
C2 O22 Mn 113.4(2) . 2 ? 
C3 O13 Cr 113.5(2) . . ? 
C4 O14 Cr 113.2(2) . . ? 
O23 C3 O13 126.4(3) . . ? 
O23 C3 C4 119.0(3) . . ? 
O13 C3 C4 114.6(3) . . ? 
O24 C4 O14 126.3(3) . . ? 
O24 C4 C3 118.3(3) . . ? 
O14 C4 C3 115.4(3) . . ? 
C3 O23 Mn 111.7(2) . 2_655 ? 
C4 O24 Mn 112.2(2) . 2_655 ? 
C5 O15 Cr 113.1(2) . . ? 
C6 O16 Cr 113.5(2) . . ? 
O25 C5 O15 126.6(3) . . ? 
O25 C5 C6 118.2(3) . . ? 
O15 C5 C6 115.2(3) . . ? 
O26 C6 O16 126.5(3) . . ? 
O26 C6 C5 118.3(3) . . ? 
O16 C6 C5 115.1(3) . . ? 
C5 O25 Mn 112.6(2) . . ? 
C6 O26 Mn 113.7(2) . . ? 
N27 C21 C22 122.3(8) . . ? 
N27 C21 C26 122.2(8) . . ? 
C22 C21 C26 114.9(9) . . ? 
C25 C26 C21 121.7(8) . . ? 
C26 C25 C24 121.8(9) . . ? 
C23 C24 C25 116.3(7) . . ? 
C23 C24 C31 117.2(8) . . ? 
C25 C24 C31 126.5(9) . . ? 
C22 C23 C24 122.3(6) . . ? 
C23 C22 C21 122.8(7) . . ? 
C30 C31 C24 126.2(8) . . ? 
C31 C30 C14 124.4(7) . . ? 
C12 N11 C16 118.7(8) . . ? 
C12 N11 C9 118.9(7) . . ? 
C16 N11 C9 122.4(8) . . ? 
N11 C12 C13 120.7(7) . . ? 
C12 C13 C14 122.0(6) . . ? 
C15 C14 C13 115.3(6) . . ? 
C15 C14 C30 117.9(7) . . ? 
C13 C14 C30 126.8(7) . . ? 
C16 C15 C14 120.5(7) . . ? 
N11 C16 C15 122.5(8) . . ? 
N11 C9 C7 112.1(6) . . ? 
N11 C9 C8 107.0(7) . . ? 
C7 C9 C8 108.9(8) . . ? 
C21 N27 C29 119.6(7) . . ? 
C21 N27 C28 121.1(8) . . ? 
C29 N27 C28 119.3(7) . . ? 
C9' N11' C12' 119.9(25) . . ? 
C9' N11' C16' 118.4(27) . . ? 
C12' N11' C16' 113.2(22) . . ? 
C13' C12' N11' 122.3(23) . . ? 
C12' C13' C14' 121.0(22) . . ? 
C15' C14' C13' 115.0(17) . . ? 
C15' C14' C30' 120.4(18) . . ? 
C13' C14' C30' 124.6(20) . . ? 
C16' C15' C14' 123.5(19) . . ? 
C15' C16' N11' 121.5(22) . . ? 
C31' C30' C14' 128.3(15) . . ? 
C30' C31' C24' 125.6(16) . . ? 
C26' C21' C22' 117.2(19) . . ? 
C26' C21' N27' 120.5(21) . . ? 
C22' C21' N27' 122.2(19) . . ? 
C21' C22' C23' 120.8(19) . . ? 
C22' C23' C24' 121.6(18) . . ? 
C23' C24' C25' 115.7(17) . . ? 
C23' C24' C31' 125.8(19) . . ? 
C25' C24' C31' 118.5(20) . . ? 
C26' C25' C24' 119.6(24) . . ? 
C21' C26' C25' 122.2(26) . . ? 
C21' N27' C28' 111.8(26) . . ? 
C21' N27' C29' 108.6(24) . . ? 
C28' N27' C29' 109.9(29) . . ? 
N11' C9' C7' 115.4(26) . . ? 
N11' C9' C8' 112.5(22) . . ? 
C7' C9' C8' 113.6(24) . . ? 
N1S C1S C2S 175.2(10) . . ? 
 
loop_ 
 _geom_torsion_atom_site_label_1 
 _geom_torsion_atom_site_label_2 
 _geom_torsion_atom_site_label_3 
 _geom_torsion_atom_site_label_4 
 _geom_torsion 
 _geom_torsion_site_symmetry_1 
 _geom_torsion_site_symmetry_2 
 _geom_torsion_site_symmetry_3 
 _geom_torsion_site_symmetry_4 
 _geom_torsion_publ_flag 
 O14 Cr O11 C1 177.8(2) . . . . ? 
 O13 Cr O11 C1 -98.8(2) . . . . ? 
 O16 Cr O11 C1 86.2(2) . . . . ? 
 O15 Cr O11 C1 41.4(8) . . . . ? 
 O12 Cr O11 C1 -5.2(2) . . . . ? 
 O14 Cr O12 C2 39.2(12) . . . . ? 
 O13 Cr O12 C2 96.9(2) . . . . ? 
 O16 Cr O12 C2 -87.2(2) . . . . ? 
 O15 Cr O12 C2 -170.2(2) . . . . ? 
 O11 Cr O12 C2 3.8(2) . . . . ? 
 Cr O11 C1 O21 -174.2(3) . . . . ? 
 Cr O11 C1 C2 5.5(3) . . . . ? 
 Cr O12 C2 O22 177.4(3) . . . . ? 
 Cr O12 C2 C1 -1.9(3) . . . . ? 
 O21 C1 C2 O22 -2.1(5) . . . . ? 
 O11 C1 C2 O22 178.1(3) . . . . ? 
 O21 C1 C2 O12 177.2(3) . . . . ? 
 O11 C1 C2 O12 -2.5(4) . . . . ? 
 O11 C1 O21 Mn 177.9(3) . . . 2 ? 
 C2 C1 O21 Mn -1.8(4) . . . 2 ? 
 O12 C2 O22 Mn -174.5(3) . . . 2 ? 
 C1 C2 O22 Mn 4.8(4) . . . 2 ? 
 O14 Cr O13 C3 -0.6(2) . . . . ? 
 O16 Cr O13 C3 41.0(9) . . . . ? 
 O15 Cr O13 C3 92.5(2) . . . . ? 
 O12 Cr O13 C3 -176.1(2) . . . . ? 
 O11 Cr O13 C3 -92.7(2) . . . . ? 
 O13 Cr O14 C4 0.8(2) . . . . ? 
 O16 Cr O14 C4 -174.7(2) . . . . ? 
 O15 Cr O14 C4 -91.6(2) . . . . ? 
 O12 Cr O14 C4 58.9(11) . . . . ? 
 O11 Cr O14 C4 94.1(2) . . . . ? 
 Cr O13 C3 O23 -178.9(3) . . . . ? 
 Cr O13 C3 C4 0.3(3) . . . . ? 
 Cr O14 C4 O24 177.6(3) . . . . ? 
 Cr O14 C4 C3 -0.8(3) . . . . ? 
 O23 C3 C4 O24 1.1(5) . . . . ? 
 O13 C3 C4 O24 -178.2(3) . . . . ? 
 O23 C3 C4 O14 179.6(3) . . . . ? 
 O13 C3 C4 O14 0.3(4) . . . . ? 
 O13 C3 O23 Mn -173.2(3) . . . 2_655 ? 
 C4 C3 O23 Mn 7.6(4) . . . 2_655 ? 
 O14 C4 O24 Mn 172.4(3) . . . 2_655 ? 
 C3 C4 O24 Mn -9.2(4) . . . 2_655 ? 
 O14 Cr O15 C5 -93.4(2) . . . . ? 
 O13 Cr O15 C5 -176.8(2) . . . . ? 
 O16 Cr O15 C5 -2.2(2) . . . . ? 
 O12 Cr O15 C5 89.1(2) . . . . ? 
 O11 Cr O15 C5 43.0(8) . . . . ? 
 O14 Cr O16 C6 93.7(2) . . . . ? 
 O13 Cr O16 C6 52.6(9) . . . . ? 
 O15 Cr O16 C6 0.5(2) . . . . ? 
 O12 Cr O16 C6 -90.4(2) . . . . ? 
 O11 Cr O16 C6 -173.6(2) . . . . ? 
 Cr O15 C5 O25 -174.5(3) . . . . ? 
 Cr O15 C5 C6 3.3(3) . . . . ? 
 Cr O16 C6 O26 -179.6(3) . . . . ? 
 Cr O16 C6 C5 1.0(3) . . . . ? 
 O25 C5 C6 O26 -4.4(5) . . . . ? 
 O15 C5 C6 O26 177.6(3) . . . . ? 
 O25 C5 C6 O16 175.0(3) . . . . ? 
 O15 C5 C6 O16 -3.0(4) . . . . ? 
 O15 C5 O25 Mn 179.7(3) . . . . ? 
 C6 C5 O25 Mn 2.0(4) . . . . ? 
 O26 Mn O25 C5 0.1(2) . . . . ? 
 O24 Mn O25 C5 168.2(2) 2_645 . . . ? 
 O22 Mn O25 C5 -90.9(7) 2_545 . . . ? 
 O23 Mn O25 C5 91.4(2) 2_645 . . . ? 
 O21 Mn O25 C5 -90.3(2) 2_545 . . . ? 
 O16 C6 O26 Mn -175.1(3) . . . . ? 
 C5 C6 O26 Mn 4.2(4) . . . . ? 
 O24 Mn O26 C6 -38.5(4) 2_645 . . . ? 
 O22 Mn O26 C6 168.4(2) 2_545 . . . ? 
 O23 Mn O26 C6 -100.2(2) 2_645 . . . ? 
 O21 Mn O26 C6 91.9(2) 2_545 . . . ? 
 O25 Mn O26 C6 -2.5(2) . . . . ? 
 N27 C21 C26 C25 -167.7(17) . . . . ? 
 C22 C21 C26 C25 3.6(26) . . . . ? 
 C21 C26 C25 C24 -3.6(30) . . . . ? 
 C26 C25 C24 C23 0.0(22) . . . . ? 
 C26 C25 C24 C31 -179.4(15) . . . . ? 
 C25 C24 C23 C22 3.4(15) . . . . ? 
 C31 C24 C23 C22 -177.1(8) . . . . ? 
 C24 C23 C22 C21 -3.4(15) . . . . ? 
 N27 C21 C22 C23 171.1(10) . . . . ? 
 C26 C21 C22 C23 -0.2(18) . . . . ? 
 C23 C24 C31 C30 -177.3(7) . . . . ? 
 C25 C24 C31 C30 2.2(16) . . . . ? 
 C24 C31 C30 C14 -179.5(7) . . . . ? 
 C16 N11 C12 C13 -7.1(20) . . . . ? 
 C9 N11 C12 C13 174.6(10) . . . . ? 
 N11 C12 C13 C14 5.0(18) . . . . ? 
 C12 C13 C14 C15 0.7(13) . . . . ? 
 C12 C13 C14 C30 -178.3(9) . . . . ? 
 C31 C30 C14 C15 -169.3(7) . . . . ? 
 C31 C30 C14 C13 9.8(11) . . . . ? 
 C13 C14 C15 C16 -4.1(14) . . . . ? 
 C30 C14 C15 C16 175.0(11) . . . . ? 
 C12 N11 C16 C15 3.6(23) . . . . ? 
 C9 N11 C16 C15 -178.1(12) . . . . ? 
 C14 C15 C16 N11 2.1(22) . . . . ? 
 C12 N11 C9 C7 151.2(11) . . . . ? 
 C16 N11 C9 C7 -27.1(15) . . . . ? 
 C12 N11 C9 C8 -89.6(13) . . . . ? 
 C16 N11 C9 C8 92.2(14) . . . . ? 
 C22 C21 N27 C29 -178.9(10) . . . . ? 
 C26 C21 N27 C29 -8.3(20) . . . . ? 
 C22 C21 N27 C28 4.1(17) . . . . ? 
 C26 C21 N27 C28 174.7(15) . . . . ? 
 C9' N11' C12' C13' 170.1(50) . . . . ? 
 C16' N11' C12' C13' 22.4(90) . . . . ? 
 N11' C12' C13' C14' -18.7(95) . . . . ? 
 C12' C13' C14' C15' 3.6(71) . . . . ? 
 C12' C13' C14' C30' -173.3(44) . . . . ? 
 C13' C14' C15' C16' 5.9(63) . . . . ? 
 C30' C14' C15' C16' -177.0(45) . . . . ? 
 C14' C15' C16' N11' -0.9(88) . . . . ? 
 C9' N11' C16' C15' -160.8(50) . . . . ? 
 C12' N11' C16' C15' -12.6(88) . . . . ? 
 C15' C14' C30' C31' 5.6(42) . . . . ? 
 C13' C14' C30' C31' -177.6(33) . . . . ? 
 C14' C30' C31' C24' -179.3(31) . . . . ? 
 C26' C21' C22' C23' 7.7(61) . . . . ? 
 N27' C21' C22' C23' -167.3(32) . . . . ? 
 C21' C22' C23' C24' 1.3(46) . . . . ? 
 C22' C23' C24' C25' 0.0(65) . . . . ? 
 C22' C23' C24' C31' 179.3(31) . . . . ? 
 C30' C31' C24' C23' 1.7(56) . . . . ? 
 C30' C31' C24' C25' -179.0(45) . . . . ? 
 C23' C24' C25' C26' -10.5(96) . . . . ? 
 C31' C24' C25' C26' 170.2(61) . . . . ? 
 C22' C21' C26' C25' -18.9(107) . . . . ? 
 N27' C21' C26' C25' 156.2(68) . . . . ? 
 C24' C25' C26' C21' 20.7(125) . . . . ? 
 C26' C21' N27' C28' 169.9(60) . . . . ? 
 C22' C21' N27' C28' -15.3(52) . . . . ? 
 C26' C21' N27' C29' 48.4(63) . . . . ? 
 C22' C21' N27' C29' -136.7(30) . . . . ? 
 C12' N11' C9' C7' 95.3(54) . . . . ? 
 C16' N11' C9' C7' -118.7(52) . . . . ? 
 C12' N11' C9' C8' -37.3(56) . . . . ? 
 C16' N11' C9' C8' 108.7(54) . . . . ? 
 
_refine_diff_density_max    0.275 
_refine_diff_density_min   -0.324 
_refine_diff_density_rms    0.050 

#===END

data_MIPS[MnCr(C2O4)3] 
 
_audit_creation_method            SHELXL 
#_chemical_absolute_configuration  unk???
_chemical_name_systematic 
; 
 ? 
; 
_chemical_name_common             ? 
_chemical_formula_moiety          ? 
_chemical_formula_structural      'C19H24NO[MnCr(C2O4)3]' 
_chemical_formula_analytical      ? 
_chemical_formula_sum             'C25 H24 Cr Mn N O13' 
_chemical_formula_weight          653.39 
_chemical_melting_point           ? 
_chemical_compound_source         ? 
 
loop_ 
 _atom_type_symbol 
 _atom_type_description 
 _atom_type_scat_dispersion_real 
 _atom_type_scat_dispersion_imag 
 _atom_type_scat_source 
 'C'  'C'   0.0033   0.0016 
 'International Tables Vol C Tables 4.2.6.8 and 6.1.1.4' 
 'N'  'N'   0.0061   0.0033 
 'International Tables Vol C Tables 4.2.6.8 and 6.1.1.4' 
 'O'  'O'   0.0106   0.0060 
 'International Tables Vol C Tables 4.2.6.8 and 6.1.1.4' 
 'H'  'H'   0.0000   0.0000 
 'International Tables Vol C Tables 4.2.6.8 and 6.1.1.4' 
 'Cr'  'Cr'   0.3209   0.6236 
 'International Tables Vol C Tables 4.2.6.8 and 6.1.1.4' 
 'Mn'  'Mn'   0.3368   0.7283 
 'International Tables Vol C Tables 4.2.6.8 and 6.1.1.4' 
 
_symmetry_cell_setting                 monoclinic                           
_symmetry_space_group_name_H-M         'P 21/c'                               
 
loop_ 
 _symmetry_equiv_pos_as_xyz 
 'x, y, z' 
 '-x, y+1/2, -z+1/2' 
 '-x, -y, -z' 
 'x, -y-1/2, z-1/2' 
 
_cell_length_a                    9.535(1) 
_cell_length_b                    15.890(2) 
_cell_length_c                    18.229(2) 
_cell_angle_alpha                 90.00 
_cell_angle_beta                  83.810(9) 
_cell_angle_gamma                 90.00 
_cell_volume                      2745.8(5) 
_cell_formula_units_Z             4 
_cell_measurement_temperature     296(2) 
_cell_measurement_reflns_used     ?                                             
_cell_measurement_theta_min       ?                                             
_cell_measurement_theta_max       ?                                             
 
_exptl_crystal_description             needle                                
_exptl_crystal_colour                  bright red                            
_exptl_crystal_size_max                0.4                                   
_exptl_crystal_size_mid                0.25                                  
_exptl_crystal_size_min                0.06                                  
_exptl_crystal_density_meas       ? 
_exptl_crystal_density_diffrn     1.581 
_exptl_crystal_density_method     ? 
_exptl_crystal_F_000              1336 
_exptl_absorpt_coefficient_mu     0.924 
_exptl_absorpt_correction_type    none 
_exptl_absorpt_correction_T_min   ? 
_exptl_absorpt_correction_T_max   ? 
 
_exptl_special_details 
; 
 ? 
; 
 
_diffrn_ambient_temperature       296(2) 
_diffrn_radiation_wavelength      0.71073 
_diffrn_radiation_type            MoK\a 
_diffrn_radiation_source          'fine-focus sealed tube' 
_diffrn_radiation_monochromator   graphite 
_diffrn_measurement_device 'Nonius kappaCCD diffractometer'                     
_diffrn_measurement_method 'area-detector scans'                                
_diffrn_standards_number          ?                                             
_diffrn_standards_interval_count  ? 
_diffrn_standards_interval_time   ?                                             
_diffrn_standards_decay_%         ?                                             
_diffrn_reflns_number             4261 
_diffrn_reflns_av_R_equivalents   0.0222 
_diffrn_reflns_av_sigmaI/netI     0.0456 
_diffrn_reflns_limit_h_min        -9 
_diffrn_reflns_limit_h_max        9 
_diffrn_reflns_limit_k_min        -15 
_diffrn_reflns_limit_k_max        15 
_diffrn_reflns_limit_l_min        -16 
_diffrn_reflns_limit_l_max        16 
_diffrn_reflns_theta_min          1.70 
_diffrn_reflns_theta_max          21.90 
_reflns_number_total              2310 
_reflns_number_gt                 1937 
_reflns_threshold_expression      >2sigma(I) 
 
_computing_data_collection        'Kappa CCD ENRAFNONUS software' 
_computing_cell_refinement        'Kappa CCD ENRAFNONUS software' 
_computing_data_reduction         'Kappa CCD ENRAFNONUS software'
_computing_structure_solution     'SHELXS-86 (Sheldrick, 1990)' 
_computing_structure_refinement   'SHELXL-93 (Sheldrick, 1993)' 
_computing_molecular_graphics     'ORTEPII, Johnson' 
_computing_publication_material   'ACTA' 
 
_refine_special_details 
; 
 Refinement on F^2^ for ALL reflections except for 12 with very negative F^2^ 
 or flagged by the user for potential systematic errors.  Weighted R-factors 
 wR and all goodnesses of fit S are based on F^2^, conventional R-factors R 
 are based on F, with F set to zero for negative F^2^. The observed criterion 
 of F^2^ > 2sigma(F^2^) is used only for calculating _R_factor_obs etc. and is 
 not relevant to the choice of reflections for refinement.  R-factors based 
 on F^2^ are statistically about twice as large as those based on F, and R- 
 factors based on ALL data will be even larger. 
; 
 
_refine_ls_structure_factor_coef  Fsqd  
_refine_ls_matrix_type            full 
_refine_ls_weighting_scheme 
 'calc w=1/[\s^2^(Fo^2^)+(0.0010P)^2^+9.0101P] where P=(Fo^2^+2Fc^2^)/3' 
_atom_sites_solution_primary      direct 
_atom_sites_solution_secondary    difmap 
_atom_sites_solution_hydrogens    geom 
_refine_ls_hydrogen_treatment     constr 
_refine_ls_extinction_method      none 
_refine_ls_extinction_coef        ? 
_refine_ls_number_reflns          2298 
_refine_ls_number_parameters      373 
_refine_ls_number_restraints      0 
_refine_ls_R_factor_all           0.0670 
_refine_ls_R_factor_gt            0.0507 
_refine_ls_wR_factor_all          0.1249 
_refine_ls_wR_factor_ref          0.1037 
_refine_ls_goodness_of_fit_all    1.161 
_refine_ls_goodness_of_fit_ref    1.216 
_refine_ls_restrained_S_all       1.321 
_refine_ls_restrained_S_obs       1.216 
_refine_ls_shift/su_max           0.013 
_refine_ls_shift/esd_mean         0.003 
 
loop_ 
 _atom_site_label 
 _atom_site_type_symbol 
 _atom_site_fract_x 
 _atom_site_fract_y 
 _atom_site_fract_z 
 _atom_site_U_iso_or_equiv 
 _atom_site_thermal_displace_type 
 _atom_site_occupancy 
 _atom_site_calc_flag 
 _atom_site_refinement_flags 
 _atom_site_disorder_group 
Cr Cr 0.26199(11) 0.08415(7) 0.22367(6) 0.0427(4) Uani 1 d . . 
Mn Mn 0.75801(10) 0.24547(7) 0.24488(6) 0.0481(4) Uani 1 d . . 
O11 O 0.1567(5) 0.1722(3) 0.1674(3) 0.0560(14) Uani 1 d . . 
O12 O 0.0715(5) 0.0873(3) 0.2896(3) 0.0521(13) Uani 1 d . . 
O13 O 0.3475(5) 0.1738(3) 0.2877(3) 0.0515(13) Uani 1 d . . 
O14 O 0.4571(5) 0.0996(3) 0.1646(3) 0.0527(14) Uani 1 d . . 
O15 O 0.3360(5) -0.0093(3) 0.2870(3) 0.0530(14) Uani 1 d . . 
O16 O 0.1969(5) -0.0204(3) 0.1686(3) 0.0539(14) Uani 1 d . . 
O21 O 0.9502(5) 0.2425(3) 0.1782(3) 0.0551(14) Uani 1 d . . 
O22 O 0.8605(5) 0.1492(3) 0.2958(3) 0.0493(13) Uani 1 d . . 
O23 O 0.5577(5) 0.2315(3) 0.3020(3) 0.0527(14) Uani 1 d . . 
O24 O 0.6639(5) 0.1617(3) 0.1740(3) 0.0540(14) Uani 1 d . . 
O25 O 0.6857(5) 0.3515(3) 0.1954(3) 0.0527(14) Uani 1 d . . 
O26 O 0.8200(5) 0.3399(3) 0.3158(3) 0.0535(14) Uani 1 d . . 
C1 C 0.9843(9) 0.1377(5) 0.2670(4) 0.045(2) Uani 1 d . . 
C2 C 1.0348(8) 0.1894(5) 0.1981(4) 0.045(2) Uani 1 d . . 
C3 C 0.4766(9) 0.1873(4) 0.2685(4) 0.044(2) Uani 1 d . . 
C4 C 0.5380(9) 0.1454(4) 0.1961(4) 0.044(2) Uani 1 d . . 
C5 C 0.7042(7) 0.4185(6) 0.2297(5) 0.045(2) Uani 1 d . . 
C6 C 0.7828(7) 0.4119(6) 0.2983(5) 0.046(2) Uani 1 d . . 
N11 N 1.1541(6) 0.1809(4) -0.0526(3) 0.053(2) Uani 1 d . . 
C12 C 1.1189(8) 0.2572(5) -0.0745(4) 0.055(2) Uani 1 d . . 
H12 H 1.1847 0.2884 -0.1046 0.067 Uiso 1 calc . . 
C13 C 0.9895(8) 0.2908(5) -0.0543(4) 0.054(2) Uani 1 d . . 
H13 H 0.9672 0.3440 -0.0708 0.064 Uiso 1 calc . . 
C14 C 0.8906(7) 0.2454(5) -0.0088(4) 0.053(2) Uani 1 d . . 
C15 C 0.9303(9) 0.1686(5) 0.0148(4) 0.063(2) Uani 1 d . . 
H15 H 0.8669 0.1376 0.0464 0.076 Uiso 1 calc . . 
C16 C 1.0599(9) 0.1361(5) -0.0066(5) 0.066(2) Uani 1 d . . 
H16 H 1.0844 0.0834 0.0102 0.079 Uiso 1 calc . . 
C17 C 1.2948(8) 0.1432(5) -0.0787(5) 0.060(2) Uani 1 d . . 
H17 H 1.3490 0.1864 -0.1078 0.071 Uiso 1 calc . . 
C18 C 1.3731(8) 0.1239(5) -0.0137(5) 0.072(3) Uani 1 d . . 
H18A H 1.3295 0.0759 0.0125 0.086 Uiso 1 calc . . 
H18B H 1.3656 0.1716 0.0197 0.086 Uiso 1 calc . . 
C19 C 1.5285(8) 0.1048(5) -0.0360(5) 0.083(3) Uani 1 d . . 
H19A H 1.5757(14) 0.0973(32) 0.0075(5) 0.108 Uiso 1 calc R . 
H19B H 1.5709(15) 0.1507(15) -0.0646(24) 0.108 Uiso 1 calc R . 
H19C H 1.5367(8) 0.0542(18) -0.0649(24) 0.108 Uiso 1 calc R . 
C10 C 1.2783(10) 0.0695(6) -0.1297(6) 0.097(3) Uani 1 d . . 
H10A H 1.3711 0.0466 -0.1451 0.117 Uiso 1 calc . . 
H10B H 1.2241 0.0261 -0.1021 0.117 Uiso 1 calc . . 
C11 C 1.2084(12) 0.0895(8) -0.1969(7) 0.152(5) Uani 1 d . . 
H11A H 1.1876(82) 0.0382(8) -0.2213(27) 0.198 Uiso 1 calc R . 
H11B H 1.2701(38) 0.1236(45) -0.2297(22) 0.198 Uiso 1 calc R . 
H11C H 1.1223(48) 0.1197(49) -0.1829(8) 0.198 Uiso 1 calc R . 
O O 0.1255(6) 0.4528(3) 0.0307(3) 0.068(2) Uani 1 d . . 
C20 C 0.0361(8) 0.4328(5) 0.0952(4) 0.080(3) Uani 1 d . . 
H20A H -0.0528(21) 0.4608(26) 0.0940(14) 0.103 Uiso 1 calc R . 
H20B H 0.0791(25) 0.4510(28) 0.1377(5) 0.103 Uiso 1 calc R . 
H20C H 0.0214(43) 0.3730(6) 0.0976(15) 0.103 Uiso 1 calc R . 
C21 C 0.2590(8) 0.4209(5) 0.0229(5) 0.054(2) Uani 1 d . . 
C22 C 0.3393(9) 0.4423(5) -0.0416(5) 0.059(2) Uani 1 d . . 
H22 H 0.3011 0.4759 -0.0762 0.071 Uiso 1 calc . . 
C23 C 0.4751(9) 0.4143(5) -0.0549(4) 0.060(2) Uani 1 d . . 
H23 H 0.5283 0.4303 -0.0984 0.072 Uiso 1 calc . . 
C24 C 0.5361(8) 0.3634(5) -0.0063(5) 0.051(2) Uani 1 d . . 
C25 C 0.4533(9) 0.3424(5) 0.0587(5) 0.064(2) Uani 1 d . . 
H25 H 0.4919 0.3091 0.0934 0.077 Uiso 1 calc . . 
C26 C 0.3153(9) 0.3696(5) 0.0731(4) 0.063(2) Uani 1 d . . 
H26 H 0.2611 0.3534 0.1162 0.076 Uiso 1 calc . . 
C31 C 0.6828(9) 0.3352(5) -0.0225(4) 0.062(2) Uani 1 d . . 
H31 H 0.7355 0.3614 -0.0620 0.074 Uiso 1 calc . . 
C30 C 0.7477(9) 0.2776(6) 0.0120(5) 0.067(2) Uani 1 d . . 
H30 H 0.6984 0.2547 0.0541 0.080 Uiso 1 calc . . 
 
loop_ 
 _atom_site_aniso_label 
 _atom_site_aniso_U_11 
 _atom_site_aniso_U_22 
 _atom_site_aniso_U_33 
 _atom_site_aniso_U_23 
 _atom_site_aniso_U_13 
 _atom_site_aniso_U_12 
Cr 0.0299(7) 0.0407(7) 0.0569(9) -0.0008(6) -0.0016(6) 0.0021(5) 
Mn 0.0336(7) 0.0418(7) 0.0683(9) 0.0008(6) -0.0033(6) 0.0024(5) 
O11 0.046(3) 0.058(3) 0.061(4) 0.012(3) 0.012(3) -0.002(3) 
O12 0.043(3) 0.053(3) 0.060(4) 0.014(3) -0.004(3) 0.000(3) 
O13 0.039(3) 0.049(3) 0.063(4) -0.011(2) 0.009(3) 0.001(3) 
O14 0.049(3) 0.051(3) 0.058(4) -0.012(3) -0.005(3) 0.006(3) 
O15 0.049(3) 0.053(4) 0.059(4) -0.010(3) -0.017(3) -0.003(3) 
O16 0.043(3) 0.066(4) 0.056(4) 0.003(3) -0.018(3) 0.006(3) 
O21 0.046(3) 0.052(3) 0.066(4) 0.023(3) -0.005(3) 0.000(3) 
O22 0.036(3) 0.052(3) 0.058(4) 0.007(2) 0.004(3) -0.005(2) 
O23 0.049(3) 0.050(3) 0.057(4) -0.013(3) 0.002(3) 0.000(3) 
O24 0.044(3) 0.056(3) 0.058(4) -0.007(3) 0.011(3) 0.004(3) 
O25 0.040(3) 0.061(4) 0.059(4) -0.002(3) -0.019(3) 0.003(3) 
O26 0.041(3) 0.059(4) 0.064(4) 0.009(3) -0.018(3) 0.000(3) 
C1 0.037(5) 0.047(5) 0.051(6) -0.003(4) -0.002(5) -0.010(4) 
C2 0.037(5) 0.043(5) 0.055(6) 0.002(4) -0.005(5) -0.008(4) 
C3 0.039(5) 0.038(5) 0.053(6) 0.006(4) 0.001(5) 0.005(4) 
C4 0.045(6) 0.031(5) 0.052(6) 0.008(4) 0.007(5) 0.004(4) 
C5 0.030(4) 0.055(6) 0.050(6) 0.002(5) -0.006(4) -0.008(4) 
C6 0.033(5) 0.053(6) 0.053(6) 0.006(5) -0.001(5) -0.007(4) 
N11 0.050(4) 0.054(5) 0.055(5) 0.002(4) 0.001(4) 0.002(4) 
C12 0.060(6) 0.058(6) 0.047(5) 0.005(4) 0.000(4) -0.013(5) 
C13 0.047(5) 0.058(5) 0.056(6) 0.001(4) -0.006(5) 0.008(5) 
C14 0.040(5) 0.070(6) 0.049(6) -0.010(5) 0.002(4) -0.001(5) 
C15 0.054(6) 0.059(6) 0.074(6) 0.013(5) 0.010(5) 0.000(5) 
C16 0.059(6) 0.058(6) 0.078(7) 0.014(5) 0.004(5) -0.003(5) 
C17 0.052(5) 0.061(6) 0.065(6) 0.001(5) 0.002(5) 0.004(4) 
C18 0.057(6) 0.077(6) 0.079(7) -0.002(5) 0.004(5) 0.014(5) 
C19 0.061(6) 0.083(7) 0.105(8) 0.014(6) -0.006(5) 0.007(5) 
C10 0.085(7) 0.114(9) 0.094(8) -0.039(7) -0.012(6) 0.020(6) 
C11 0.141(11) 0.205(15) 0.116(11) -0.075(10) -0.046(9) 0.048(10) 
O 0.051(4) 0.076(4) 0.074(4) 0.013(3) 0.004(3) 0.015(3) 
C20 0.065(6) 0.097(7) 0.072(7) 0.009(5) 0.013(6) 0.021(5) 
C21 0.053(6) 0.055(5) 0.053(6) 0.001(4) -0.001(5) -0.004(5) 
C22 0.058(6) 0.069(6) 0.052(6) 0.009(4) -0.008(5) 0.005(5) 
C23 0.063(6) 0.061(6) 0.055(6) 0.004(5) -0.004(5) 0.004(5) 
C24 0.044(5) 0.055(5) 0.053(6) -0.008(4) 0.003(5) 0.001(4) 
C25 0.061(6) 0.072(6) 0.061(6) 0.012(5) -0.017(5) 0.013(5) 
C26 0.060(6) 0.073(6) 0.055(6) 0.014(5) 0.001(5) 0.015(5) 
C31 0.063(6) 0.065(6) 0.056(6) -0.005(5) -0.003(5) -0.004(5) 
C30 0.061(6) 0.079(7) 0.059(7) -0.004(5) -0.002(5) 0.003(5) 
 
_geom_special_details 
; 
 All esds (except the esd in the dihedral angle between two l.s. planes) 
 are estimated using the full covariance matrix.  The cell esds are taken 
 into account individually in the estimation of esds in distances, angles 
 and torsion angles; correlations between esds in cell parameters are only 
 used when they are defined by crystal symmetry.  An approximate (isotropic) 
 treatment of cell esds is used for estimating esds involving l.s. planes. 
; 
 
loop_ 
 _geom_bond_atom_site_label_1 
 _geom_bond_atom_site_label_2 
 _geom_bond_distance 
 _geom_bond_site_symmetry_2 
 _geom_bond_publ_flag 
Cr O15 2.053(5) . ? 
Cr O11 2.059(5) . ? 
Cr O14 2.061(5) . ? 
Cr O13 2.065(5) . ? 
Cr O12 2.068(5) . ? 
Cr O16 2.070(5) . ? 
Mn O25 2.065(5) . ? 
Mn O22 2.086(5) . ? 
Mn O23 2.087(5) . ? 
Mn O21 2.088(5) . ? 
Mn O26 2.107(5) . ? 
Mn O24 2.121(5) . ? 
O11 C2 1.265(8) 1_455 ? 
O12 C1 1.256(8) 1_455 ? 
O13 C3 1.261(8) . ? 
O14 C4 1.245(8) . ? 
O15 C5 1.257(8) 2_645 ? 
O16 C6 1.257(8) 2_645 ? 
O21 C2 1.247(8) . ? 
O22 C1 1.252(8) . ? 
O23 C3 1.252(8) . ? 
O24 C4 1.252(8) . ? 
O25 C5 1.256(8) . ? 
O26 C6 1.249(8) . ? 
C1 O12 1.256(8) 1_655 ? 
C1 C2 1.535(10) . ? 
C2 O11 1.265(8) 1_655 ? 
C3 C4 1.537(10) . ? 
C5 O15 1.257(8) 2_655 ? 
C5 C6 1.530(11) . ? 
C6 O16 1.257(8) 2_655 ? 
N11 C12 1.331(9) . ? 
N11 C16 1.362(9) . ? 
N11 C17 1.500(9) . ? 
C12 C13 1.359(10) . ? 
C13 C14 1.389(10) . ? 
C14 C15 1.361(10) . ? 
C14 C30 1.467(10) . ? 
C15 C16 1.357(10) . ? 
C17 C18 1.498(11) . ? 
C17 C10 1.513(12) . ? 
C18 C19 1.524(10) . ? 
C10 C11 1.491(13) . ? 
O C21 1.364(8) . ? 
O C20 1.412(8) . ? 
C21 C22 1.374(10) . ? 
C21 C26 1.377(10) . ? 
C22 C23 1.366(10) . ? 
C23 C24 1.373(10) . ? 
C24 C25 1.392(10) . ? 
C24 C31 1.469(10) . ? 
C25 C26 1.383(10) . ? 
C31 C30 1.303(10) . ? 
 
loop_ 
 _geom_angle_atom_site_label_1 
 _geom_angle_atom_site_label_2 
 _geom_angle_atom_site_label_3 
 _geom_angle 
 _geom_angle_site_symmetry_1 
 _geom_angle_site_symmetry_3 
 _geom_angle_publ_flag 
O15 Cr O11 171.0(2) . . ? 
O15 Cr O14 92.0(2) . . ? 
O11 Cr O14 96.9(2) . . ? 
O15 Cr O13 90.0(2) . . ? 
O11 Cr O13 93.2(2) . . ? 
O14 Cr O13 79.9(2) . . ? 
O15 Cr O12 91.4(2) . . ? 
O11 Cr O12 80.1(2) . . ? 
O14 Cr O12 170.9(2) . . ? 
O13 Cr O12 91.7(2) . . ? 
O15 Cr O16 80.3(2) . . ? 
O11 Cr O16 96.7(2) . . ? 
O14 Cr O16 98.2(2) . . ? 
O13 Cr O16 170.1(2) . . ? 
O12 Cr O16 90.6(2) . . ? 
O25 Mn O22 170.9(2) . . ? 
O25 Mn O23 88.5(2) . . ? 
O22 Mn O23 98.5(2) . . ? 
O25 Mn O21 94.4(2) . . ? 
O22 Mn O21 79.5(2) . . ? 
O23 Mn O21 170.8(2) . . ? 
O25 Mn O26 79.4(2) . . ? 
O22 Mn O26 94.2(2) . . ? 
O23 Mn O26 94.1(2) . . ? 
O21 Mn O26 94.9(2) . . ? 
O25 Mn O24 93.6(2) . . ? 
O22 Mn O24 93.5(2) . . ? 
O23 Mn O24 79.2(2) . . ? 
O21 Mn O24 91.9(2) . . ? 
O26 Mn O24 170.5(2) . . ? 
C2 O11 Cr 113.7(5) 1_455 . ? 
C1 O12 Cr 113.4(5) 1_455 . ? 
C3 O13 Cr 113.1(5) . . ? 
C4 O14 Cr 113.5(5) . . ? 
C5 O15 Cr 113.1(5) 2_645 . ? 
C6 O16 Cr 112.6(5) 2_645 . ? 
C2 O21 Mn 113.6(4) . . ? 
C1 O22 Mn 112.7(5) . . ? 
C3 O23 Mn 113.3(4) . . ? 
C4 O24 Mn 112.8(5) . . ? 
C5 O25 Mn 113.7(5) . . ? 
C6 O26 Mn 113.0(5) . . ? 
O22 C1 O12 125.7(7) . 1_655 ? 
O22 C1 C2 117.6(7) . . ? 
O12 C1 C2 116.7(7) 1_655 . ? 
O21 C2 O11 127.6(7) . 1_655 ? 
O21 C2 C1 116.4(7) . . ? 
O11 C2 C1 116.0(7) 1_655 . ? 
O23 C3 O13 126.5(7) . . ? 
O23 C3 C4 117.7(7) . . ? 
O13 C3 C4 115.8(7) . . ? 
O14 C4 O24 126.4(7) . . ? 
O14 C4 C3 116.8(7) . . ? 
O24 C4 C3 116.8(7) . . ? 
O15 C5 O25 126.1(8) 2_655 . ? 
O15 C5 C6 116.7(7) 2_655 . ? 
O25 C5 C6 117.2(8) . . ? 
O26 C6 O16 126.8(8) . 2_655 ? 
O26 C6 C5 116.6(8) . . ? 
O16 C6 C5 116.6(8) 2_655 . ? 
C12 N11 C16 119.4(6) . . ? 
C12 N11 C17 121.0(6) . . ? 
C16 N11 C17 119.6(7) . . ? 
N11 C12 C13 121.8(6) . . ? 
C12 C13 C14 119.8(7) . . ? 
C15 C14 C13 117.4(7) . . ? 
C15 C14 C30 120.9(8) . . ? 
C13 C14 C30 121.7(8) . . ? 
C16 C15 C14 121.8(7) . . ? 
C15 C16 N11 119.8(7) . . ? 
C18 C17 N11 109.7(6) . . ? 
C18 C17 C10 114.9(8) . . ? 
N11 C17 C10 110.8(7) . . ? 
C17 C18 C19 112.5(7) . . ? 
C11 C10 C17 115.2(9) . . ? 
C21 O C20 118.4(6) . . ? 
O C21 C22 115.1(8) . . ? 
O C21 C26 125.3(7) . . ? 
C22 C21 C26 119.6(7) . . ? 
C23 C22 C21 120.1(7) . . ? 
C22 C23 C24 122.5(7) . . ? 
C23 C24 C25 116.7(7) . . ? 
C23 C24 C31 120.7(7) . . ? 
C25 C24 C31 122.6(8) . . ? 
C26 C25 C24 121.8(7) . . ? 
C21 C26 C25 119.3(7) . . ? 
C30 C31 C24 127.5(8) . . ? 
C31 C30 C14 126.6(8) . . ? 
 
loop_ 
 _geom_torsion_atom_site_label_1 
 _geom_torsion_atom_site_label_2 
 _geom_torsion_atom_site_label_3 
 _geom_torsion_atom_site_label_4 
 _geom_torsion 
 _geom_torsion_site_symmetry_1 
 _geom_torsion_site_symmetry_2 
 _geom_torsion_site_symmetry_3 
 _geom_torsion_site_symmetry_4 
 _geom_torsion_publ_flag 
 O15 Cr O11 C2 22.4(16) . . . 1_455 ? 
 O14 Cr O11 C2 -168.8(5) . . . 1_455 ? 
 O13 Cr O11 C2 -88.6(5) . . . 1_455 ? 
 O12 Cr O11 C2 2.5(5) . . . 1_455 ? 
 O16 Cr O11 C2 92.0(5) . . . 1_455 ? 
 O15 Cr O12 C1 -176.8(5) . . . 1_455 ? 
 O11 Cr O12 C1 0.1(5) . . . 1_455 ? 
 O14 Cr O12 C1 71.4(15) . . . 1_455 ? 
 O13 Cr O12 C1 93.1(5) . . . 1_455 ? 
 O16 Cr O12 C1 -96.5(5) . . . 1_455 ? 
 O15 Cr O13 C3 83.4(5) . . . . ? 
 O11 Cr O13 C3 -105.0(5) . . . . ? 
 O14 Cr O13 C3 -8.6(5) . . . . ? 
 O12 Cr O13 C3 174.8(5) . . . . ? 
 O16 Cr O13 C3 71.1(13) . . . . ? 
 O15 Cr O14 C4 -82.6(5) . . . . ? 
 O11 Cr O14 C4 99.2(5) . . . . ? 
 O13 Cr O14 C4 7.1(5) . . . . ? 
 O12 Cr O14 C4 29.2(16) . . . . ? 
 O16 Cr O14 C4 -163.0(5) . . . . ? 
 O11 Cr O15 C5 63.1(15) . . . 2_645 ? 
 O14 Cr O15 C5 -105.8(5) . . . 2_645 ? 
 O13 Cr O15 C5 174.3(5) . . . 2_645 ? 
 O12 Cr O15 C5 82.6(5) . . . 2_645 ? 
 O16 Cr O15 C5 -7.8(4) . . . 2_645 ? 
 O15 Cr O16 C6 7.0(4) . . . 2_645 ? 
 O11 Cr O16 C6 -164.5(4) . . . 2_645 ? 
 O14 Cr O16 C6 97.6(5) . . . 2_645 ? 
 O13 Cr O16 C6 19.4(13) . . . 2_645 ? 
 O12 Cr O16 C6 -84.3(5) . . . 2_645 ? 
 O25 Mn O21 C2 172.0(5) . . . . ? 
 O22 Mn O21 C2 -1.1(5) . . . . ? 
 O23 Mn O21 C2 -79.4(14) . . . . ? 
 O26 Mn O21 C2 92.3(5) . . . . ? 
 O24 Mn O21 C2 -94.2(5) . . . . ? 
 O25 Mn O22 C1 -46.1(14) . . . . ? 
 O23 Mn O22 C1 174.1(5) . . . . ? 
 O21 Mn O22 C1 3.1(5) . . . . ? 
 O26 Mn O22 C1 -91.1(5) . . . . ? 
 O24 Mn O22 C1 94.5(5) . . . . ? 
 O25 Mn O23 C3 90.1(5) . . . . ? 
 O22 Mn O23 C3 -95.7(5) . . . . ? 
 O21 Mn O23 C3 -18.9(16) . . . . ? 
 O26 Mn O23 C3 169.4(5) . . . . ? 
 O24 Mn O23 C3 -3.8(5) . . . . ? 
 O25 Mn O24 C4 -85.8(5) . . . . ? 
 O22 Mn O24 C4 100.0(5) . . . . ? 
 O23 Mn O24 C4 2.0(5) . . . . ? 
 O21 Mn O24 C4 179.7(5) . . . . ? 
 O26 Mn O24 C4 -43.9(14) . . . . ? 
 O22 Mn O25 C5 -48.9(14) . . . . ? 
 O23 Mn O25 C5 91.4(5) . . . . ? 
 O21 Mn O25 C5 -97.3(5) . . . . ? 
 O26 Mn O25 C5 -3.1(4) . . . . ? 
 O24 Mn O25 C5 170.5(5) . . . . ? 
 O25 Mn O26 C6 2.3(4) . . . . ? 
 O22 Mn O26 C6 175.8(4) . . . . ? 
 O23 Mn O26 C6 -85.4(5) . . . . ? 
 O21 Mn O26 C6 95.9(5) . . . . ? 
 O24 Mn O26 C6 -40.4(14) . . . . ? 
 Mn O22 C1 O12 175.6(6) . . . 1_655 ? 
 Mn O22 C1 C2 -4.5(7) . . . . ? 
 Mn O21 C2 O11 178.1(6) . . . 1_655 ? 
 Mn O21 C2 C1 -0.8(8) . . . . ? 
 O22 C1 C2 O21 3.7(10) . . . . ? 
 O12 C1 C2 O21 -176.3(7) 1_655 . . . ? 
 O22 C1 C2 O11 -175.3(6) . . . 1_655 ? 
 O12 C1 C2 O11 4.7(10) 1_655 . . 1_655 ? 
 Mn O23 C3 O13 -174.4(6) . . . . ? 
 Mn O23 C3 C4 4.8(8) . . . . ? 
 Cr O13 C3 O23 -172.1(6) . . . . ? 
 Cr O13 C3 C4 8.6(7) . . . . ? 
 Cr O14 C4 O24 176.5(5) . . . . ? 
 Cr O14 C4 C3 -4.8(8) . . . . ? 
 Mn O24 C4 O14 178.5(6) . . . . ? 
 Mn O24 C4 C3 -0.3(7) . . . . ? 
 O23 C3 C4 O14 178.0(6) . . . . ? 
 O13 C3 C4 O14 -2.7(9) . . . . ? 
 O23 C3 C4 O24 -3.2(10) . . . . ? 
 O13 C3 C4 O24 176.1(6) . . . . ? 
 Mn O25 C5 O15 -176.5(5) . . . 2_655 ? 
 Mn O25 C5 C6 3.3(7) . . . . ? 
 Mn O26 C6 O16 178.6(5) . . . 2_655 ? 
 Mn O26 C6 C5 -1.3(7) . . . . ? 
 O15 C5 C6 O26 178.5(6) 2_655 . . . ? 
 O25 C5 C6 O26 -1.4(9) . . . . ? 
 O15 C5 C6 O16 -1.4(9) 2_655 . . 2_655 ? 
 O25 C5 C6 O16 178.7(6) . . . 2_655 ? 
 C16 N11 C12 C13 -2.3(11) . . . . ? 
 C17 N11 C12 C13 176.9(7) . . . . ? 
 N11 C12 C13 C14 0.7(12) . . . . ? 
 C12 C13 C14 C15 1.3(11) . . . . ? 
 C12 C13 C14 C30 -177.5(7) . . . . ? 
 C13 C14 C15 C16 -1.7(12) . . . . ? 
 C30 C14 C15 C16 177.1(8) . . . . ? 
 C14 C15 C16 N11 0.2(13) . . . . ? 
 C12 N11 C16 C15 1.8(12) . . . . ? 
 C17 N11 C16 C15 -177.3(7) . . . . ? 
 C12 N11 C17 C18 120.8(8) . . . . ? 
 C16 N11 C17 C18 -60.0(9) . . . . ? 
 C12 N11 C17 C10 -111.3(9) . . . . ? 
 C16 N11 C17 C10 67.8(10) . . . . ? 
 N11 C17 C18 C19 -166.7(6) . . . . ? 
 C10 C17 C18 C19 67.8(9) . . . . ? 
 C18 C17 C10 C11 -176.4(8) . . . . ? 
 N11 C17 C10 C11 58.7(11) . . . . ? 
 C20 O C21 C22 179.4(7) . . . . ? 
 C20 O C21 C26 0.4(12) . . . . ? 
 O C21 C22 C23 179.5(7) . . . . ? 
 C26 C21 C22 C23 -1.4(12) . . . . ? 
 C21 C22 C23 C24 1.1(13) . . . . ? 
 C22 C23 C24 C25 -1.1(12) . . . . ? 
 C22 C23 C24 C31 -179.6(7) . . . . ? 
 C23 C24 C25 C26 1.5(12) . . . . ? 
 C31 C24 C25 C26 179.9(8) . . . . ? 
 O C21 C26 C25 -179.2(7) . . . . ? 
 C22 C21 C26 C25 1.8(13) . . . . ? 
 C24 C25 C26 C21 -1.9(13) . . . . ? 
 C23 C24 C31 C30 -168.9(9) . . . . ? 
 C25 C24 C31 C30 12.7(14) . . . . ? 
 C24 C31 C30 C14 174.5(7) . . . . ? 
 C15 C14 C30 C31 -157.8(9) . . . . ? 
 C13 C14 C30 C31 20.9(14) . . . . ? 
 
_refine_diff_density_max    0.273 
_refine_diff_density_min   -0.259 
_refine_diff_density_rms    0.050 

#===END
